# Supplementary material for: A three-dimensional coordination polymer based on linear trinuclear copper(ii) clusters featuring a ferromagnetic exchange interaction
Source: Royal Society of Chemistry journal article supplement (doi:10.1039/c2ce26461g), 2012-12-18
Supplement: c2ce26461g.pdf [file c2ce26461g.pdf]

## Supplementary Information

### **A three-dimensional coordination polymer constructed from linear trinuclear copper(II) clusters with a ferromagnetic exchange coupling**

**Qilong Zhu,<sup>a,b</sup> Chongbin Tian,<sup>a,b</sup> Chaojun Shen,<sup>a</sup> Tianlu Sheng,<sup>a</sup> Shengmin Hu<sup>a</sup> and  
Xintao Wu<sup>\*a</sup>**

<sup>a</sup> *State Key Laboratory of Structure Chemistry, Fujian Institute of Research on the  
Structure of Matter, Chinese Academy of Sciences, Fuzhou, 350002, China.*

<sup>b</sup> *Graduate School of the Chinese Academy of Sciences, Beijing, 100049, China.*

- Corresponding author:  
E-mail: [wxt@fjirsm.ac.cn](mailto:wxt@fjirsm.ac.cn).  
Tel: +86-591-83719238; Fax: +86-591-83719238

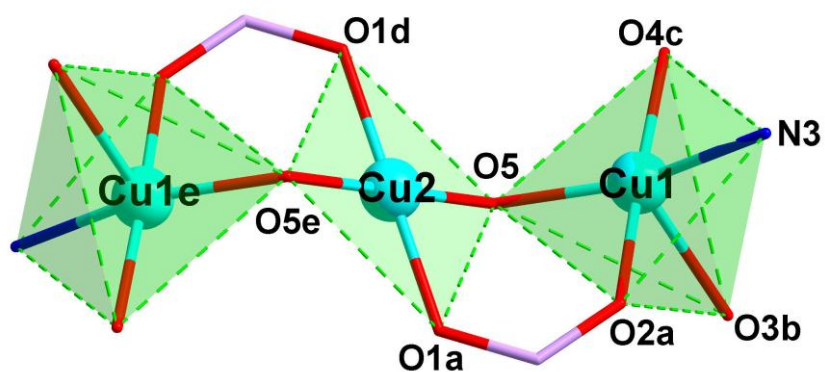

**Fig. S1** The trinuclear copper(II) cluster in compound **1**.

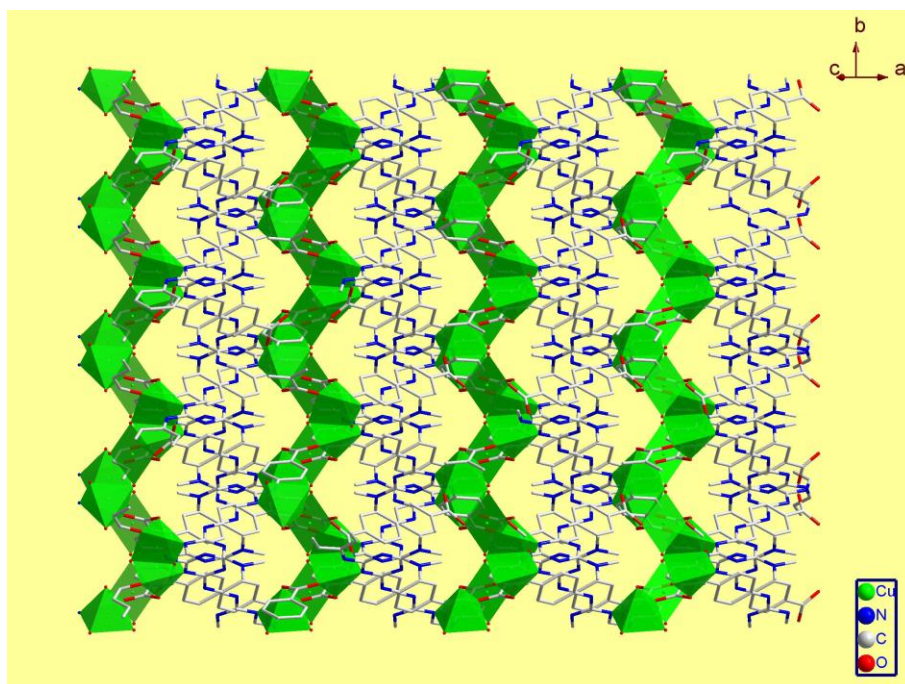

**Fig. S2** View of the 3-D framework along *b* axis with the highlighted 1-D inorganic hybrid chain in compound **1**.

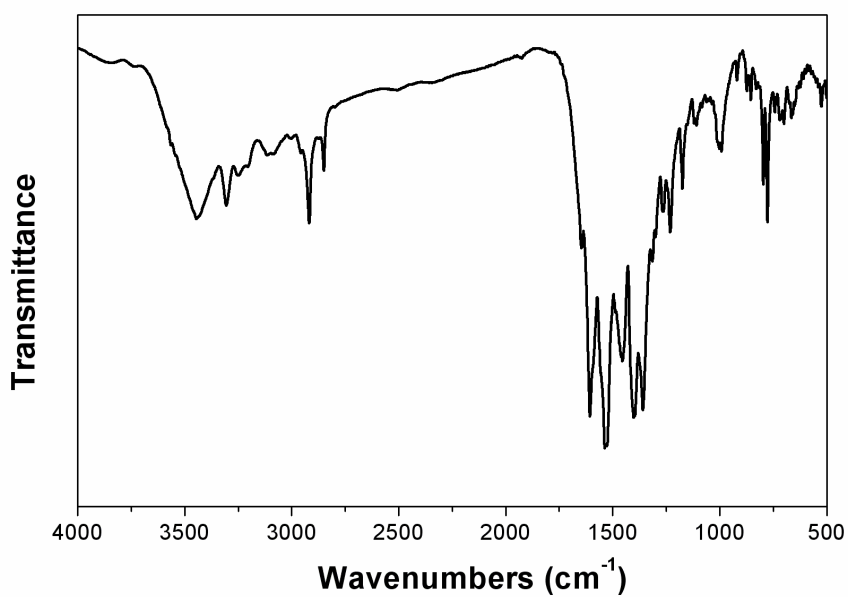

**Fig. S3** IR spectrum of compound **1**.

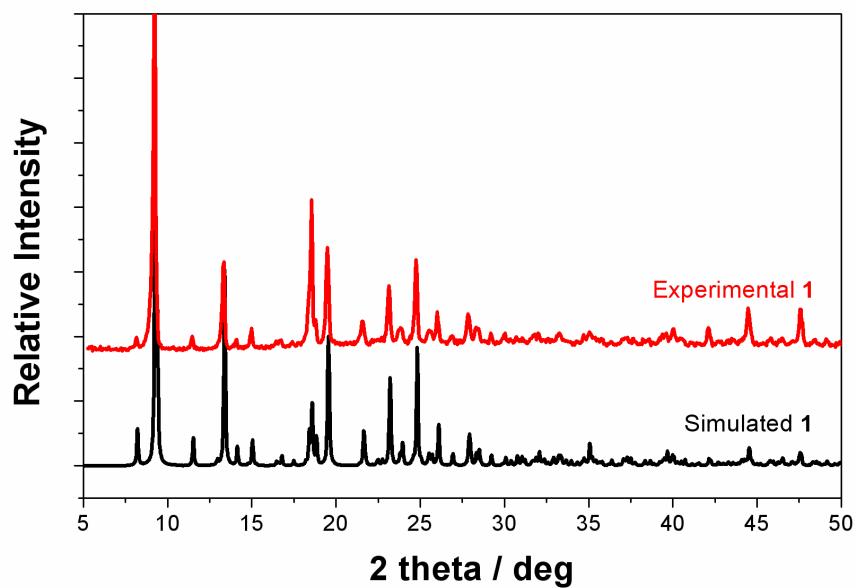

**Fig. S4** Powder X-ray diffractions for simulated and experimental **1**.

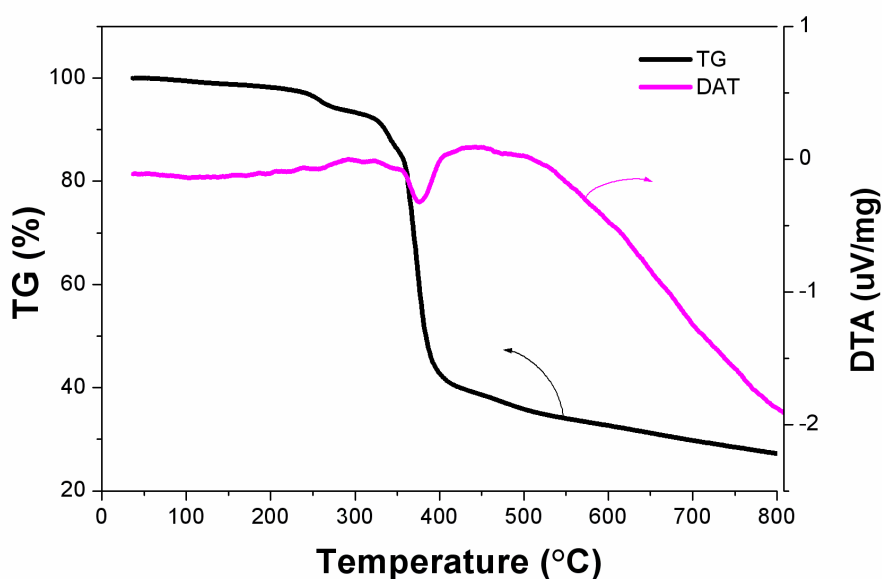

**Fig. S5** TG and DTA curves of compound **1**.

**Table S1.** Selected Bond Lengths [Å] and Angles [°] for **1**<sup>a</sup>

|             |            |             |            |
|-------------|------------|-------------|------------|
| Cu1-O5      | 1.899(3)   | Cu1-O3b     | 2.445(4)   |
| Cu1-O2a     | 1.939(3)   | Cu2-O5      | 1.895(3)   |
| Cu1-O4c     | 1.951(3)   | Cu2-O1a     | 1.948(3)   |
| Cu1-N3      | 2.077(4)   |             |            |
| O5-Cu1-O2a  | 90.05(14)  | N3-Cu1-O3b  | 102.70(12) |
| O5-Cu1-O4c  | 93.98(14)  | O5e-Cu2-O5  | 180        |
| O2a-Cu1-O4c | 174.58(14) | O5e-Cu2-O1a | 90.54(15)  |
| O5-Cu1-N3   | 159.72(15) | O5-Cu2-O1a  | 89.46(15)  |
| O2a-Cu1-N3  | 85.73(14)  | O5e-Cu2-O1d | 89.46(15)  |
| O4c-Cu1-N3  | 89.24(13)  | O5-Cu2-O1d  | 90.54(15)  |
| O5-Cu1-O3b  | 96.76(13)  | O1a-Cu2-O1d | 180        |
| O2a-Cu1-O3b | 85.87(14)  | Cu2-O5-Cu1  | 111.00(17) |
| O4c-Cu1-O3b | 97.22(13)  |             |            |

<sup>a</sup>Symmetry transformations used to generate equivalent atoms: (a)  $-x+3/2, y-1/2, -z+1/2$ ; (b)  $x+1/2, -y+1/2, z+1/2$ ; (c)  $-x+3/2, y+1/2, -z-1/2$ ; (d)  $x+1/2, -y+1/2, z-1/2$ ; (e)  $-x+2, -y, -z$ .
